# Supplementary material for: Mitochondrial DNA sequence divergence and diversity of Glossina fuscipes fuscipes in the Lake Victoria basin of Uganda: implications for control
Source: PubMed Central journal article supplement (PMC4511262; doi:10.1186/s13071-015-0984-1), 2015-07-22

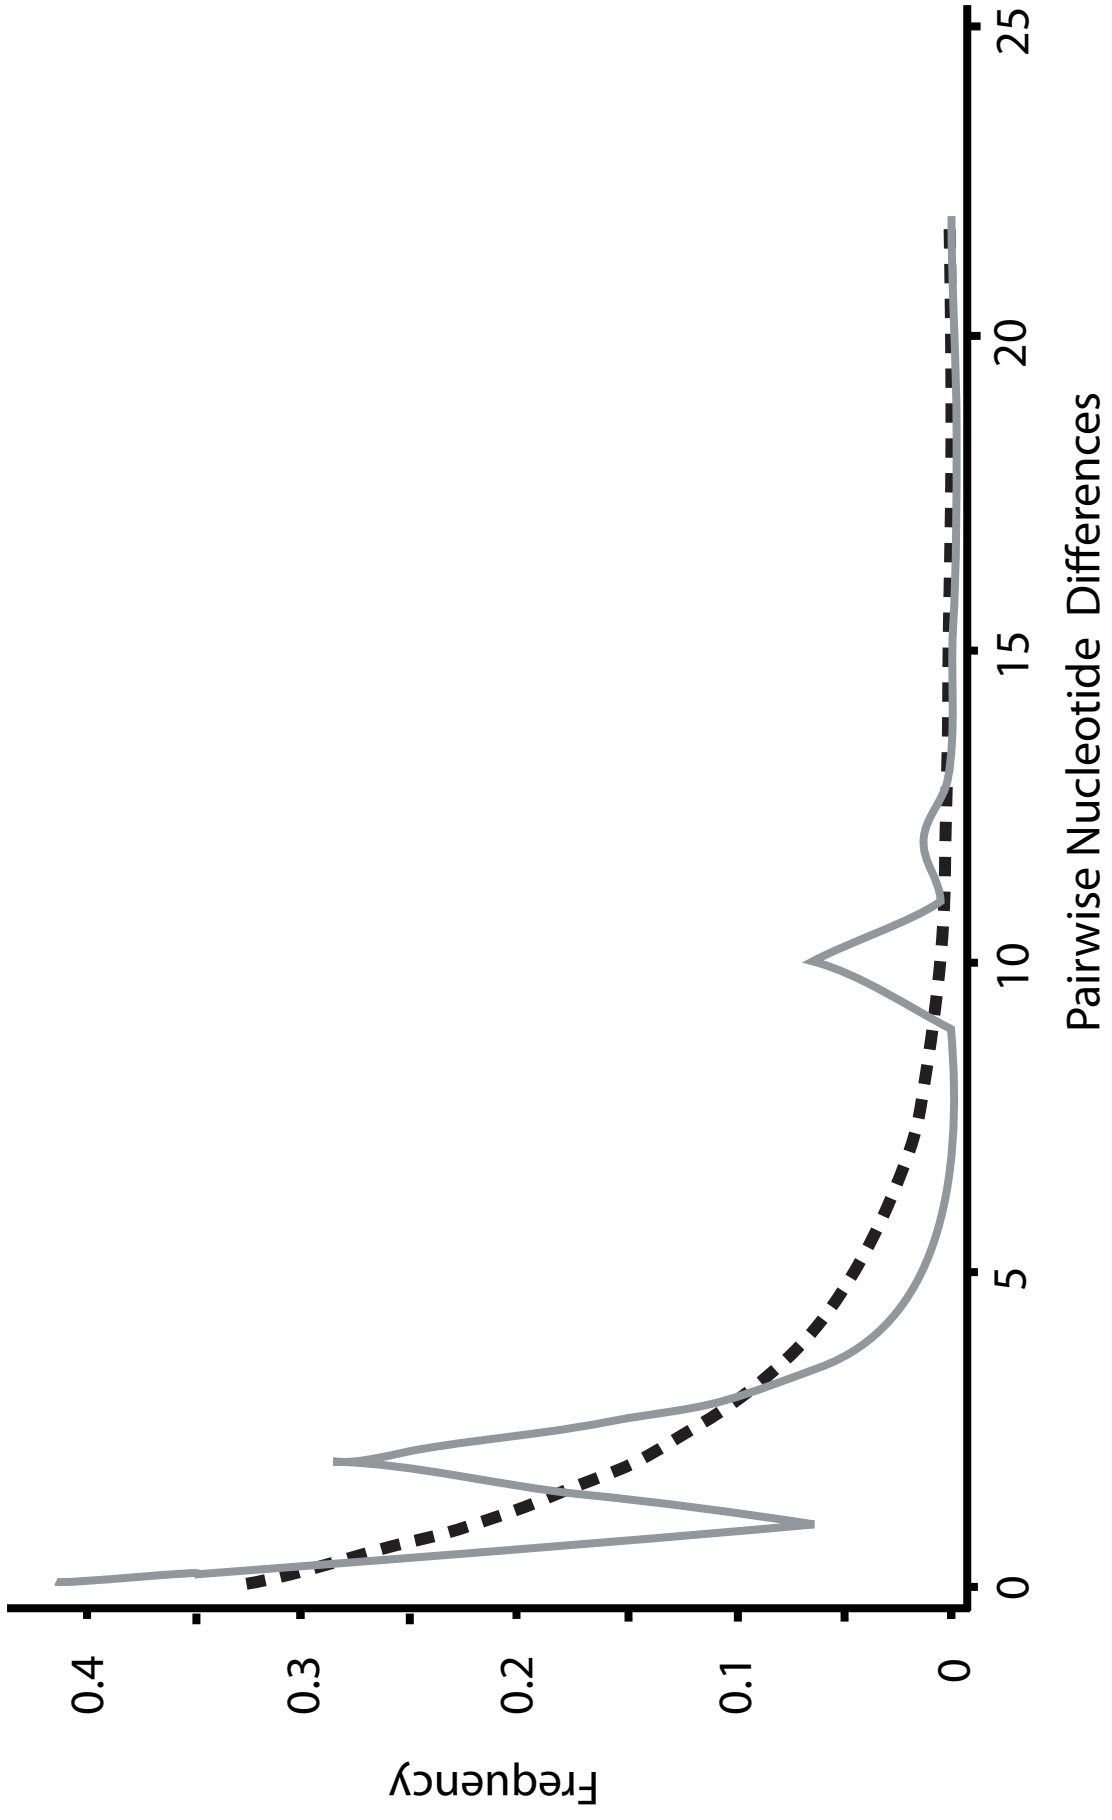

Supplement: 13071_2015_984_MOESM1_ESM.pdf [file 13071_2015_984_MOESM1_ESM.pdf]
